# Supplementary material
Source: PubMed Central journal article supplement (PMC3644734)

Fig S1

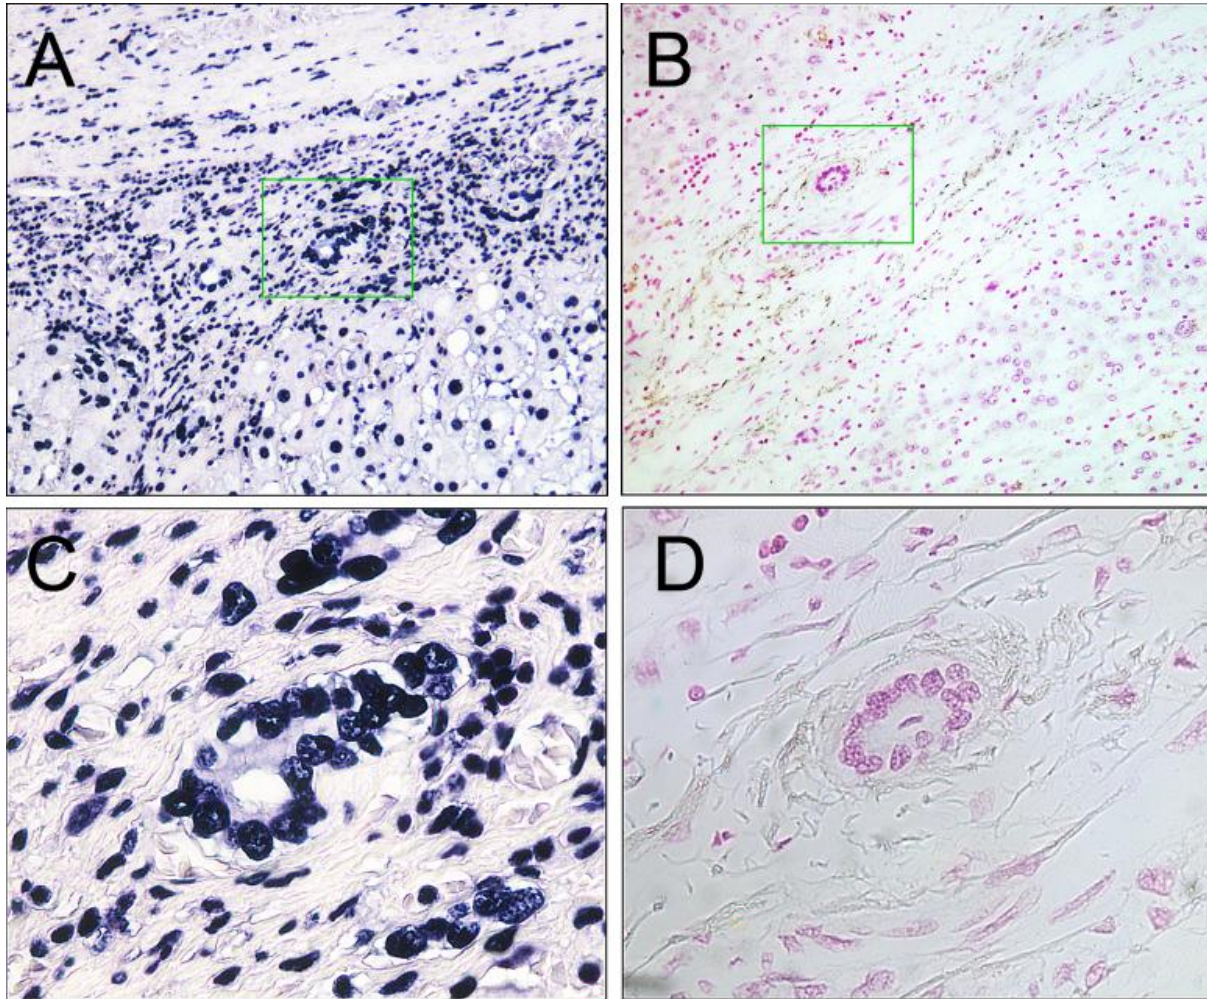

Supplement: mmc1.pdf [file mmc1.pdf]

Fig S2

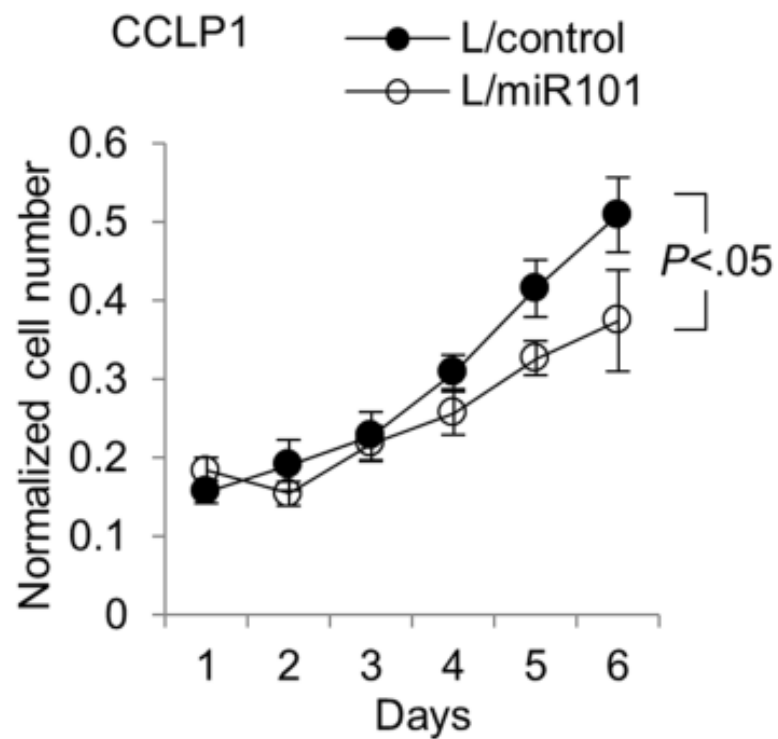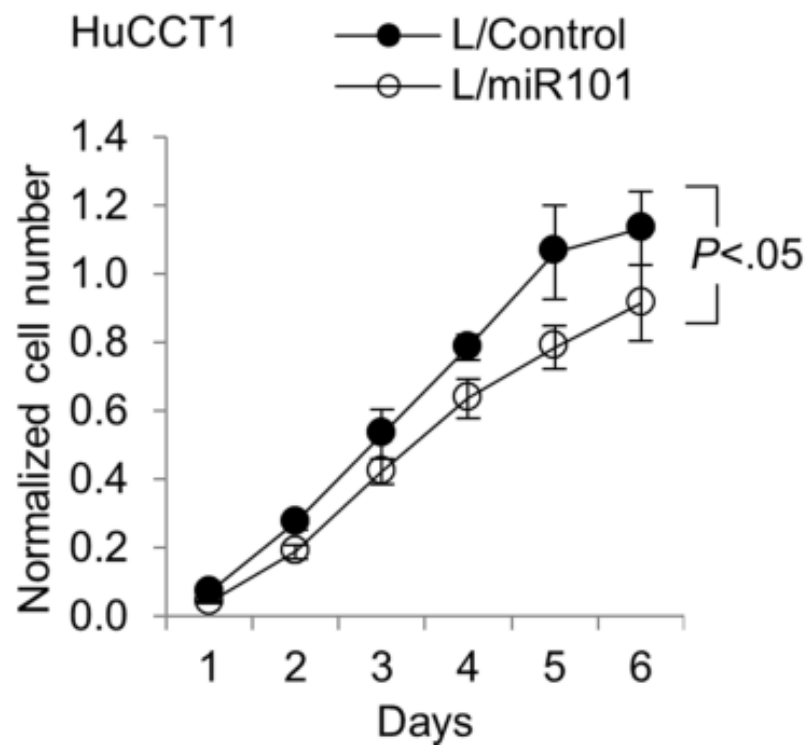

Supplement: mmc2.pdf [file mmc2.pdf]

Fig S3

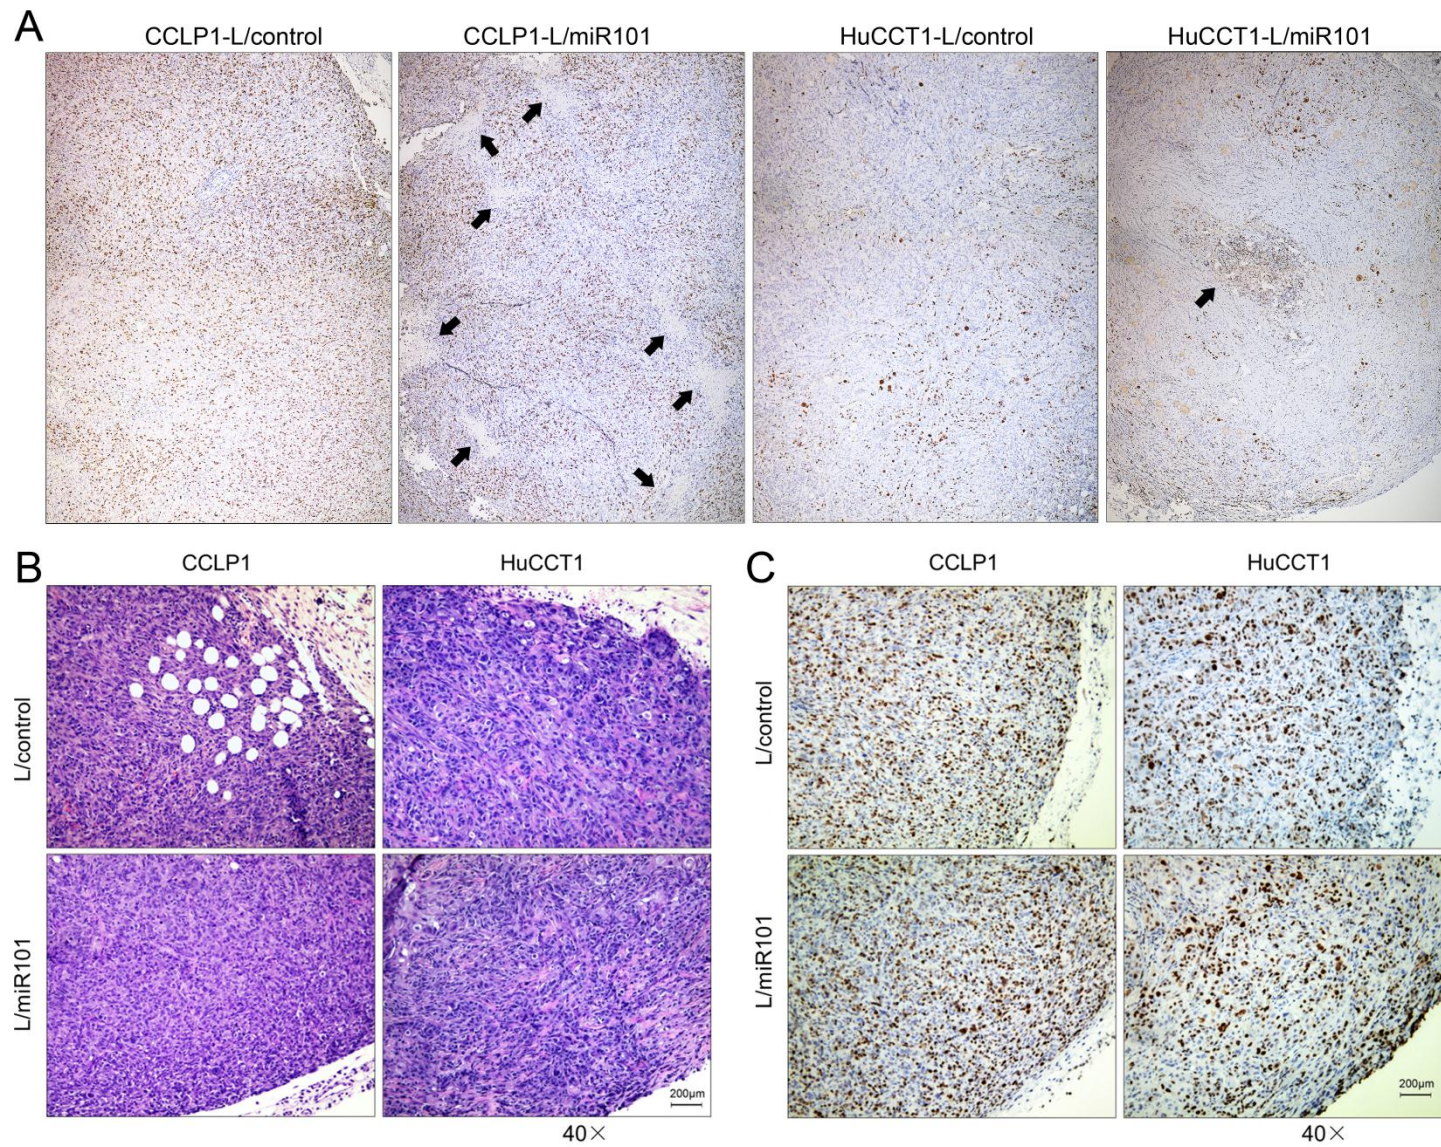

Supplement: mmc3.pdf [file mmc3.pdf]

Fig S4

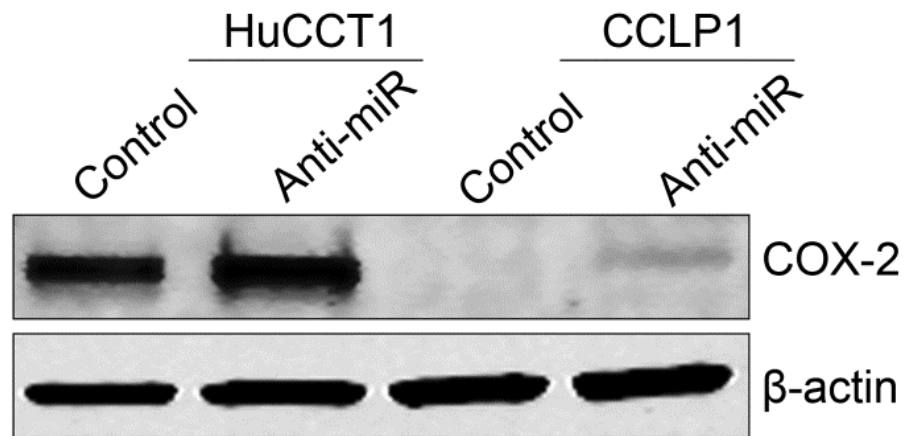

Supplement: mmc4.pdf [file mmc4.pdf]

Fig S5

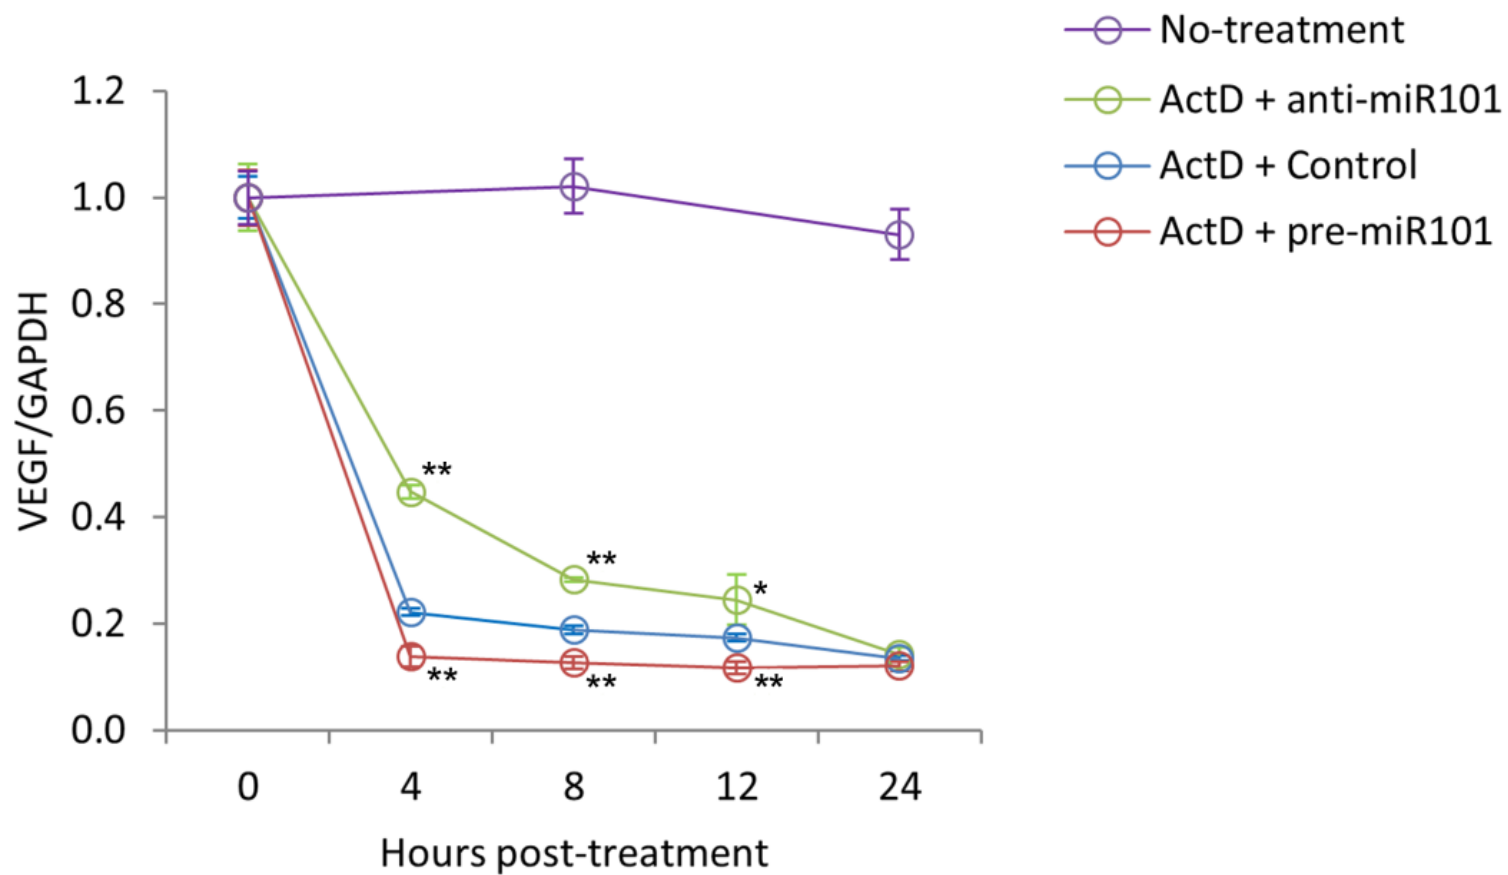

Supplement: mmc5.pdf [file mmc5.pdf]
